# Supplementary material for: Brain regions modulated during covert visual attention in the macaque
Source: PubMed Central journal article supplement (PMC6189039; doi:10.1038/s41598-018-33567-9), 2018-10-15
Supplement: 41598_2018_33567_MOESM1_ESM.pdf [file 41598_2018_33567_MOESM1_ESM.pdf]

1 **Brain regions modulated during covert visual attention in the macaque**

2 Amarender R. Bogadhi, Anil Bollimunta, David A. Leopold, Richard J. Krauzlis

3

4 **Supplementary figures**

5 **Figure S1.** Activations during Stimulus mapping experiment (related to Fig. 2)

Foveal and peripheral voxels

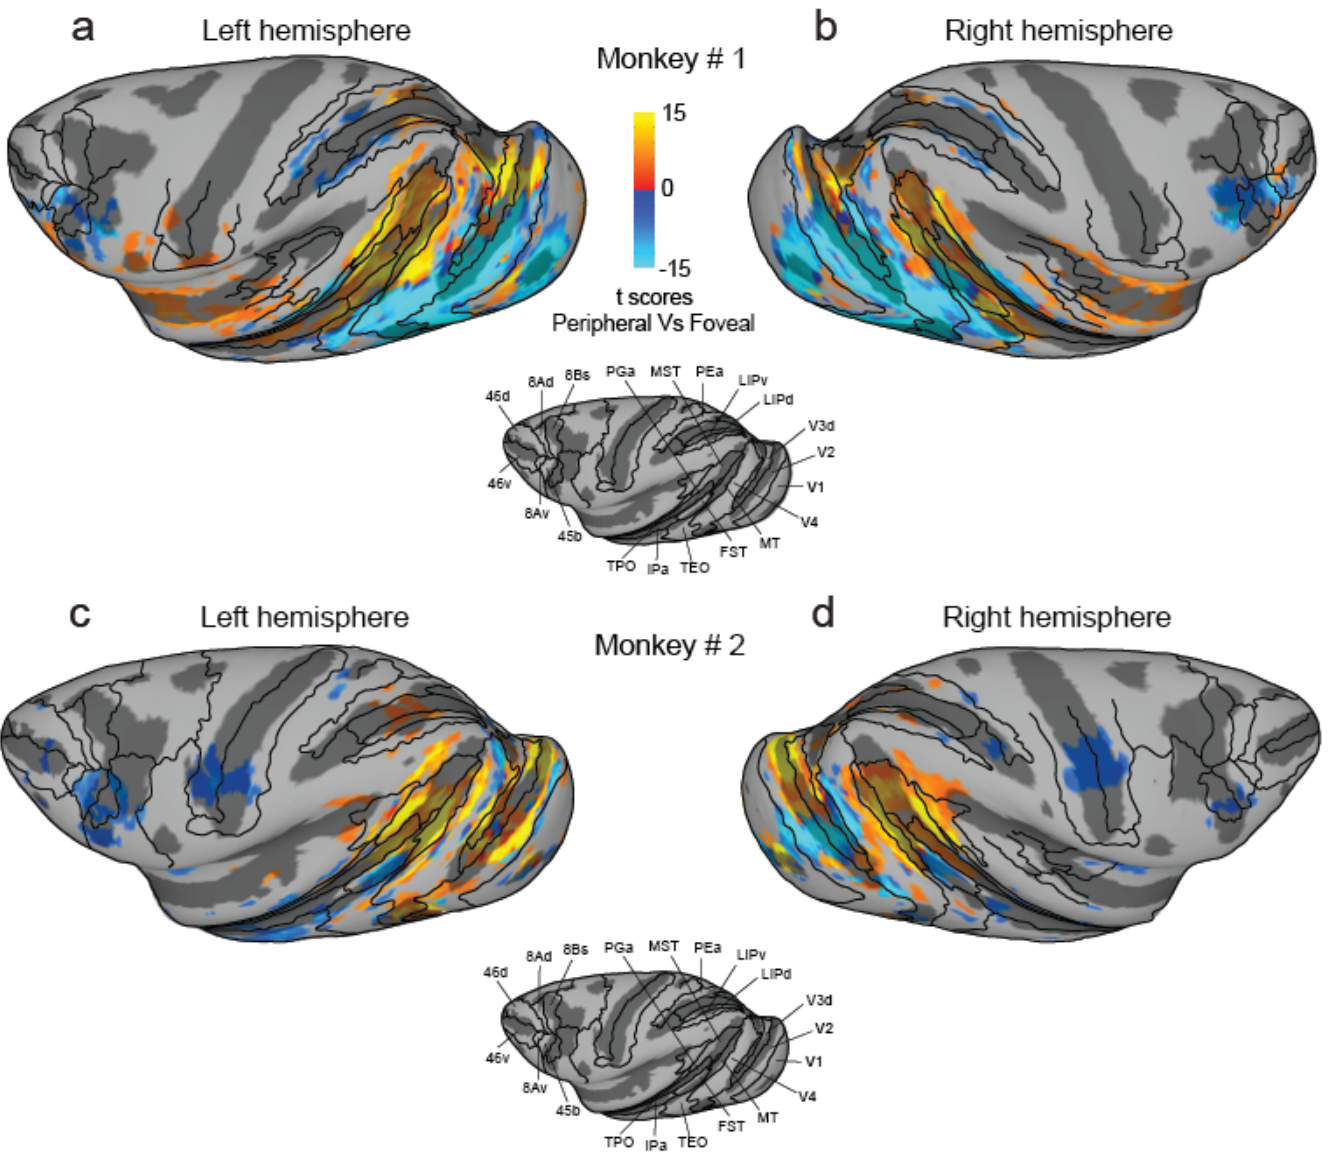

6

7 Figure S1. (a – d) T-scores contrasting Peripheral and Central stimulus conditions  
8 during stimulus mapping experiment show activations in Peripheral voxels (red to  
9 yellow) and Central 2<sup>0</sup> voxels (blue to cyan) in left (a, c) and right (b, d) hemispheres of  
10 monkey # 1 and monkey # 2 respectively. Anatomical boundaries are labeled for the left  
11 hemisphere. T-scores were corrected for multiple comparisons (Bonferroni correction;  $p$   
12  $< 0.05$ ,  $|t\text{-score}| > 5.02$ ). The foveal activations in areas TEO and V4 of monkey #2 were  
13 much sparser compared to monkey #1 because of the MR signal dropout at the lateral  
14 edges of the implant that overlapped with lateral visual cortical areas representing fovea  
15 locations.

16

17

18

19

20

21

22

23

24

25

26

27

28

29

30 **Figure S2.** Cortical maps of attention-related activation (unthresholded) (related to Fig.  
31 3)

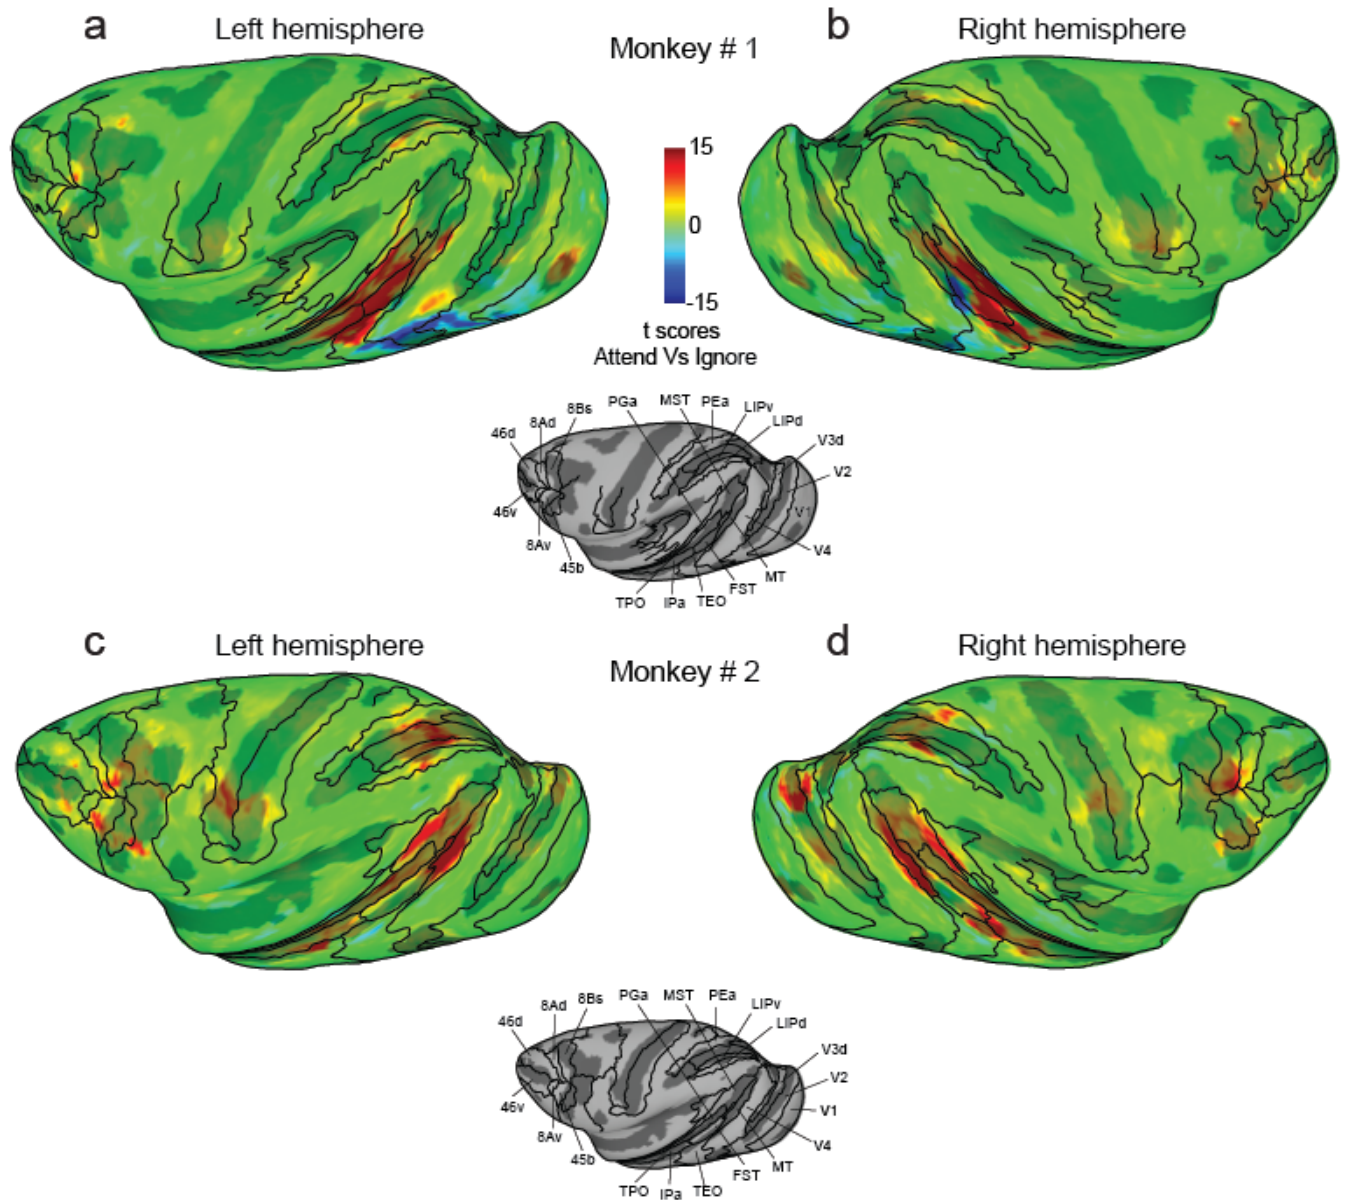

32  
33 Figure S2. T-scores (unthresholded) contrasting Attend and Ignore tasks were projected  
34 onto inflated cortical surfaces of D99 in each monkey's native space along with  
35 anatomical boundaries (black contours). (a, b) Inflated cortical maps of t-scores showing  
36 attention-related activation in left (a) and right (b) hemispheres of monkey # 1.

37 Anatomical boundaries are labeled for the left hemisphere in monkey # 1. (c, d) Inflated  
 38 cortical maps of t-scores showing attention-related activation in left (c) and right (d)  
 39 hemispheres of monkey # 2. Anatomical boundaries are labeled for the left hemisphere  
 40 in monkey # 2.

41

42 **Figure S3.** Activations during Ignore and Attend tasks using second-order orientation  
 43 stimulus (related to Fig. 8)

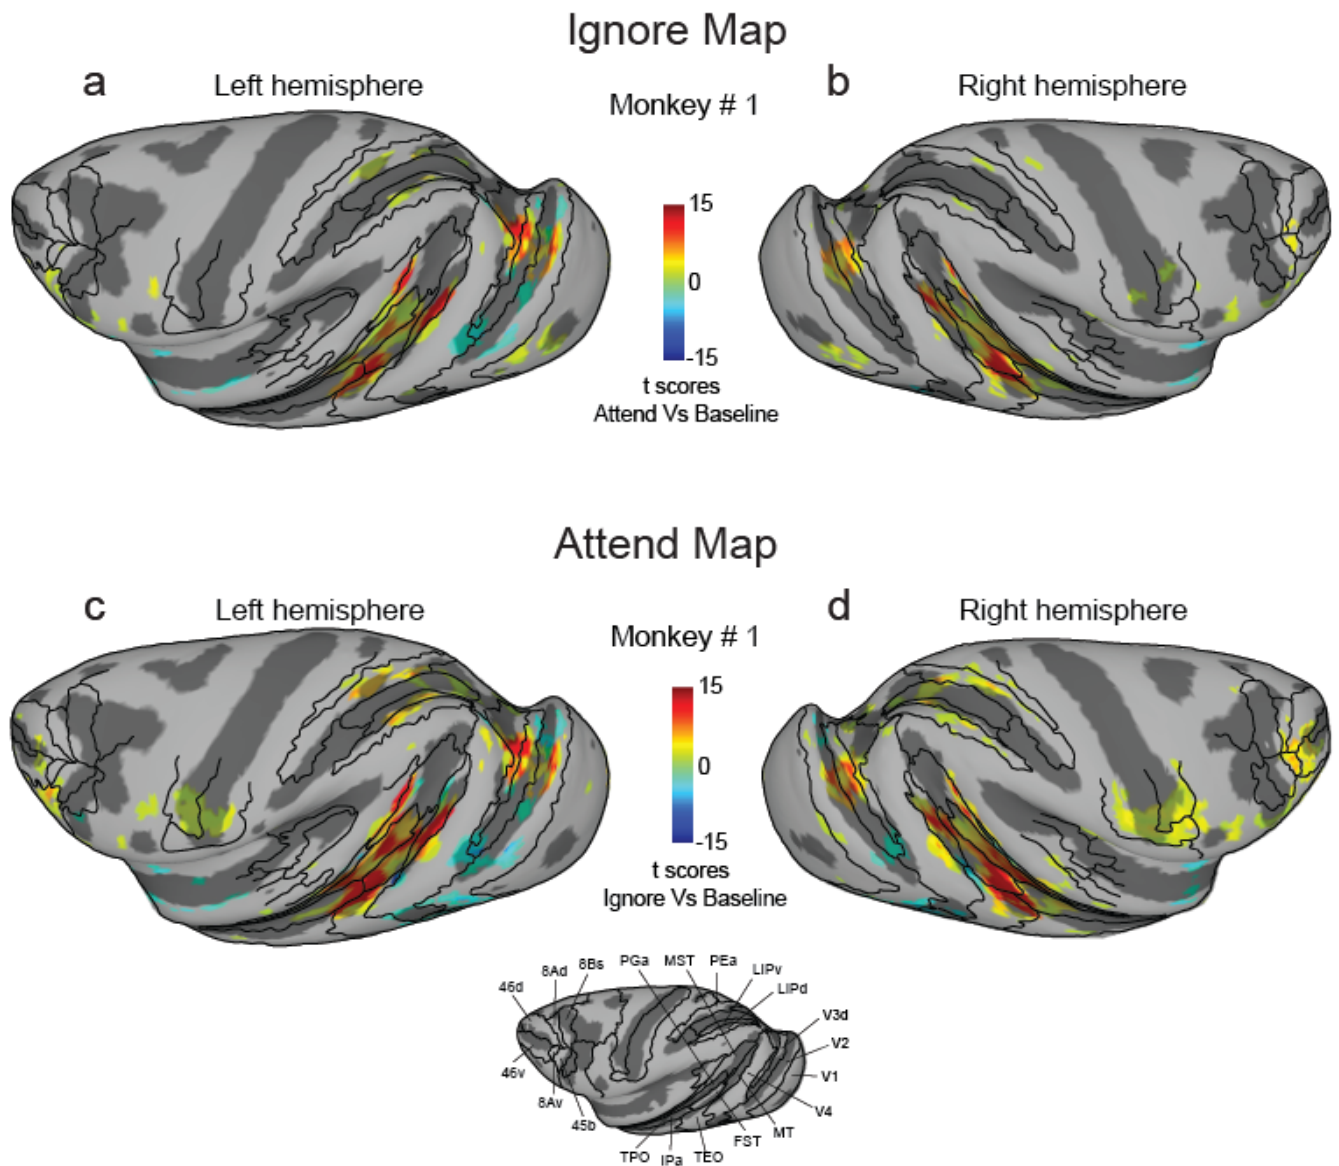

44

45 Figure S3. (a, b) T-scores contrasting Ignore and baseline tasks show activations during  
46 Ignore task in left (a) and right (b) hemispheres of monkey # 1. (c, d) T-scores  
47 contrasting Attend and baseline tasks show activations during Attend task in left (c) and  
48 right (d) hemispheres of monkey # 1. Anatomical boundaries are labeled for the left  
49 hemisphere. T-scores were corrected for multiple comparisons (Bonferroni correction;  $p$   
50  $< 0.05$ ,  $|t\text{-score}| > 5.02$ ).

51

52 **Figure S4.** Stability of attention-related modulation to second-order orientation stimulus  
53 in the aFST/IPa region (related to Fig. 8)

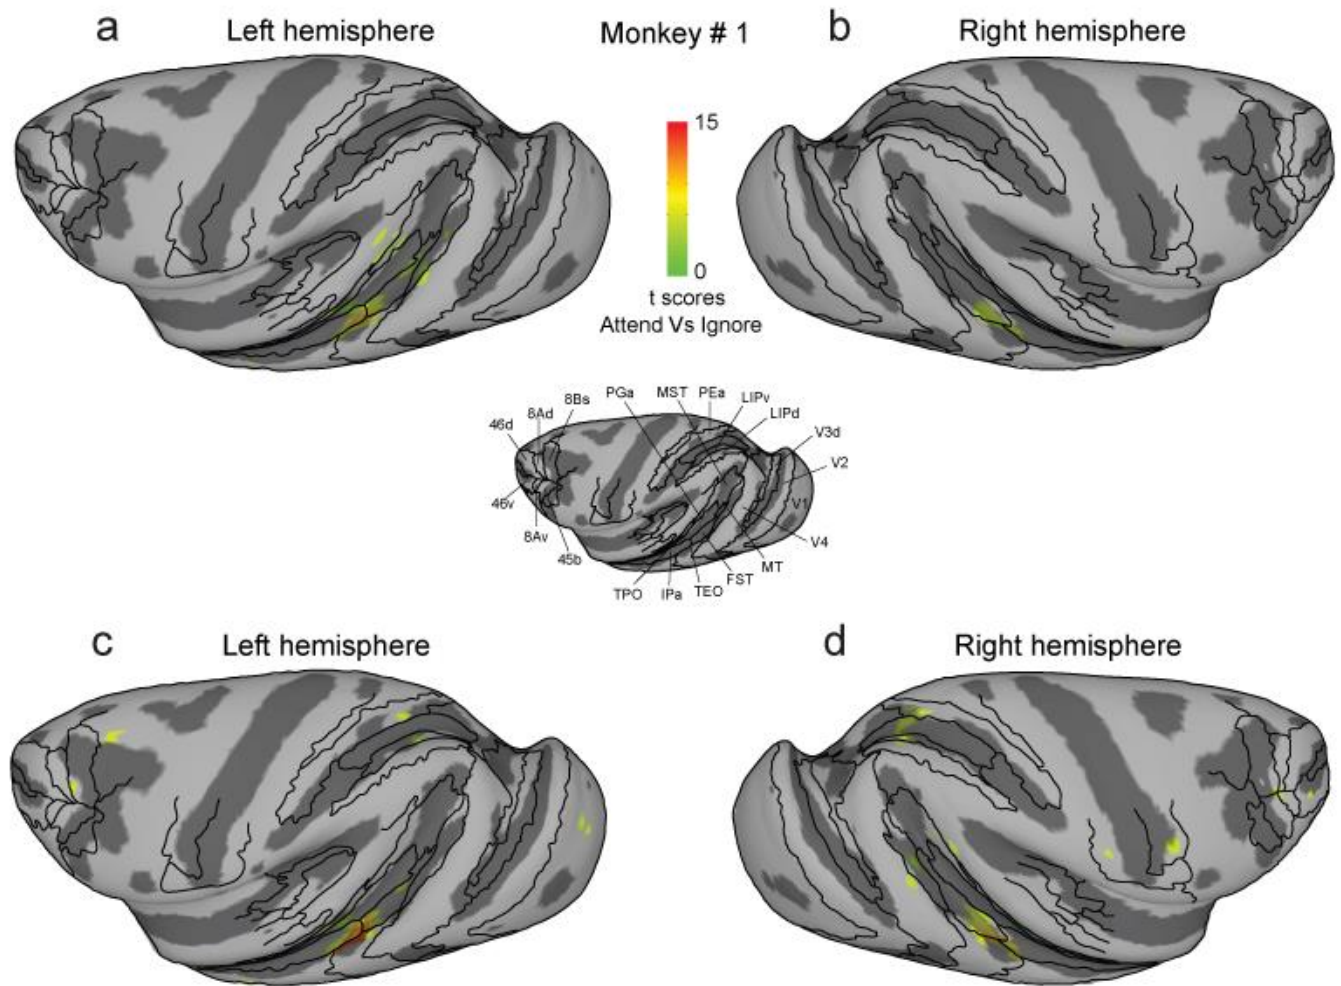

54

55

56 Figure S4. We verified the stability of attention-related modulation to second-order  
57 orientation stimulus in the aFST/IPa region by splitting the data shown in figure 8. T-  
58 scores contrasting Attend and Ignore tasks described in figure 7 were projected onto  
59 inflated cortical surfaces of D99 in native space of monkey # 1 along with anatomical  
60 boundaries (black contours). Inflated cortical maps of t-scores (Bonferroni correction;  $p$   
61  $< 0.05$ ,  $t\text{-score} > 5.02$ ) show attention-related modulation in left (a, c) and right (b, d)  
62 hemispheres of monkey # 1 for the first half (a, b) and second half (c, d) of the dataset  
63 shown in figure 8.

64

65

## 66 **Supplementary methods**

### 67 *Experimental apparatus*

68 Monkeys were seated and head-fixed in a custom-built MR-safe chair with a  
69 joystick attached inside the chair. Stimuli were back projected on to a screen placed  
70 inside the bore of the vertical magnet using an Epson projector controlled by a Windows  
71 2007 machine running MATLAB R2012b (The Mathworks) with the psychophysics  
72 toolbox extensions. The timing of the stimuli and events were controlled by a QNX  
73 system running QPCS. Monkey viewed the screen through a mirror placed in front at a  
74 45° angle. The total viewing distance of the screen was 53 cm. Eye movements were  
75 acquired and monitored in the scanner using an iView system (Version 2.4,  
76 SensoMotoric Instruments). Eye signal was calibrated at the beginning of each session.  
77 Joystick presses and releases were detected using a MRI-compatible custom device

78 that operated by detecting deflections in an optical beam and provided signals about  
79 timing but not kinematics of the joystick press and release. Joystick was calibrated once  
80 at the beginning of the experiments.

81

### 82 *Random dot motion stimuli*

83 The random dot motion stimuli were circular patches of moving dots, with the  
84 direction of motion of each dot drawn from a normal distribution with a mean value  
85 (defined as the patch motion direction) at 30° above horizontal and a 16° standard  
86 deviation. The lifetime (10 frames, 100 ms), density (25 dots/°<sup>2</sup>/s), and speed of the dots  
87 (15 °/s) were held constant. The radius of the aperture was set to 3°. Luminance of each  
88 moving dot in the motion patches was 50 cd/m<sup>2</sup>. The change in direction of motion ( $\Delta$ )  
89 was  $1 \pm 0.25$  standard deviations for both monkeys across sessions.

90

### 91 *Fixation spot stimulus*

92 The size of the fixation spot was 0.23° and the size of the central cue was 0.35°.  
93 The background luminance of the screen was 14 cd/m<sup>2</sup> and the luminance of the  
94 fixation spot was 50 cd/m<sup>2</sup>. The luminance change in fixation spot during Baseline and  
95 FA trials was 1-2 cd/m<sup>2</sup> across sessions for both monkeys.

96

### 97 *Stimulus mapping experiment*

98 To identify voxels responding to foveal and peripheral stimuli locations, a  
99 flickering checker board stimulus (4 Hz) that has concentric rings of 2° width spanning  
100 up to 12° eccentricity was used. In foveal visual stimulation blocks, the checker board

101 stimulus was masked everywhere except for the central 2° radius. In peripheral visual  
102 stimulation blocks, the checker board stimulus was masked everywhere except for the  
103 two eccentric stimulus locations used in the attention tasks. The foveal and peripheral  
104 stimulation blocks (20 s duration) were interleaved with fixation blocks (10 s duration). A  
105 total of 258 runs (150 in Monkey #1; 108 in Monkey # 2) were collected in both monkeys  
106 across 13 sessions. Functional maps showing peripheral and foveal voxels were  
107 created using the same methods as described for creating functional maps for the  
108 attention tasks (Fig. S2).

109
